# Supplementary material for: The association between osteoprotegerin and arterial stiffness in a 10-year longitudinal study of patients with type 2 diabetes
Source: PubMed Central journal article supplement — Diab Vasc Dis Res. 2024 Dec 3;21(6):14791641241304435. doi: 10.1177/14791641241304435 (PMC11615981; doi:10.1177/14791641241304435), 2024-12-03
Supplement: sj-pdf-1-dvr-10.1177_14791641241304435.pdf [file sj-pdf-1-dvr-10.1177_14791641241304435.pdf]

Supplementary Figure 1. Patient flow-chart

**For cross-sectional analysis**

1877

1337 patients excluded for fewer than 2 follow-up PWV measurements

**For longitudinal analysis**

540

12 patients excluded for no SNP data for analysis

**For Mendelian Randomization analysis**

528

PWV, pulse wave velocity; SNP, single nucleotide polymorphism

Supplementary Figure 2. Mendelian Randomization

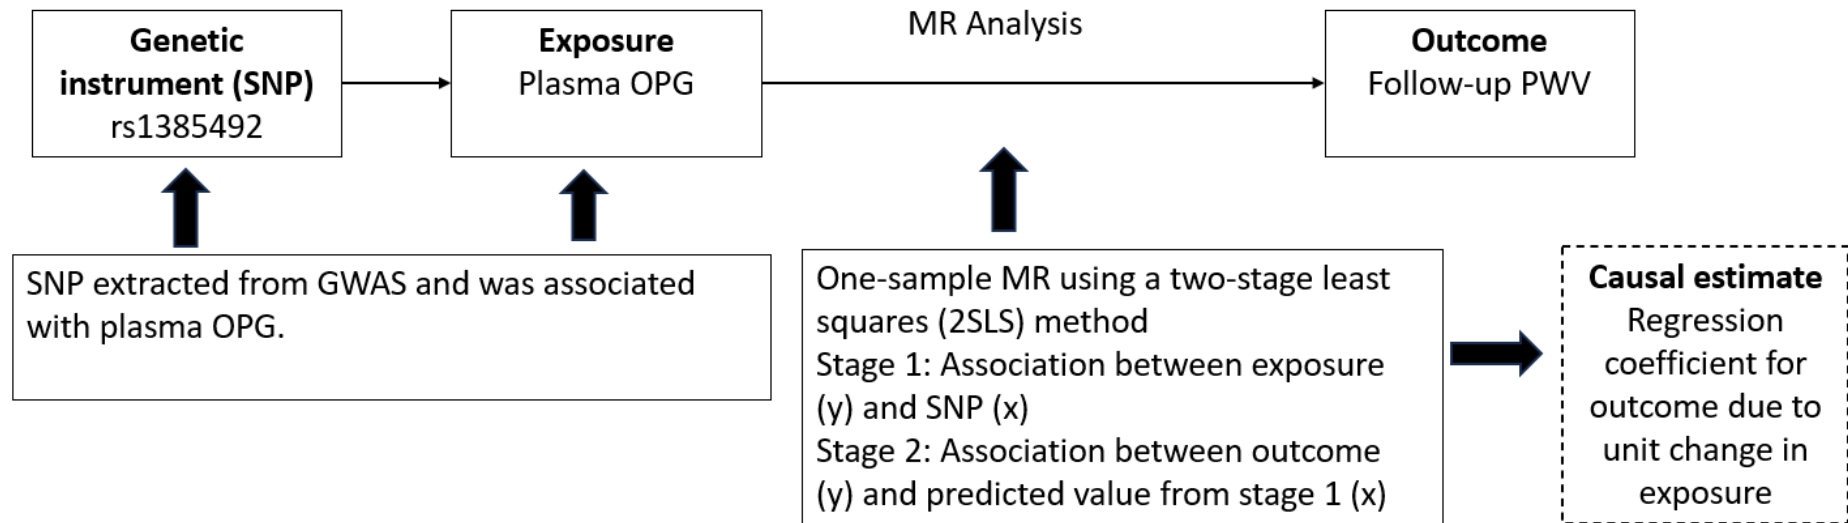

SNP, single-nucleotide polymorphism; OPG, osteoprotegerin; MR, Mendelian Randomization; PWV, pulse wave velocity; GWAS, genome-wide association study

Supplementary Figure 3. Spearman correlation between OPG and PWV at baseline stratified by systolic blood pressure

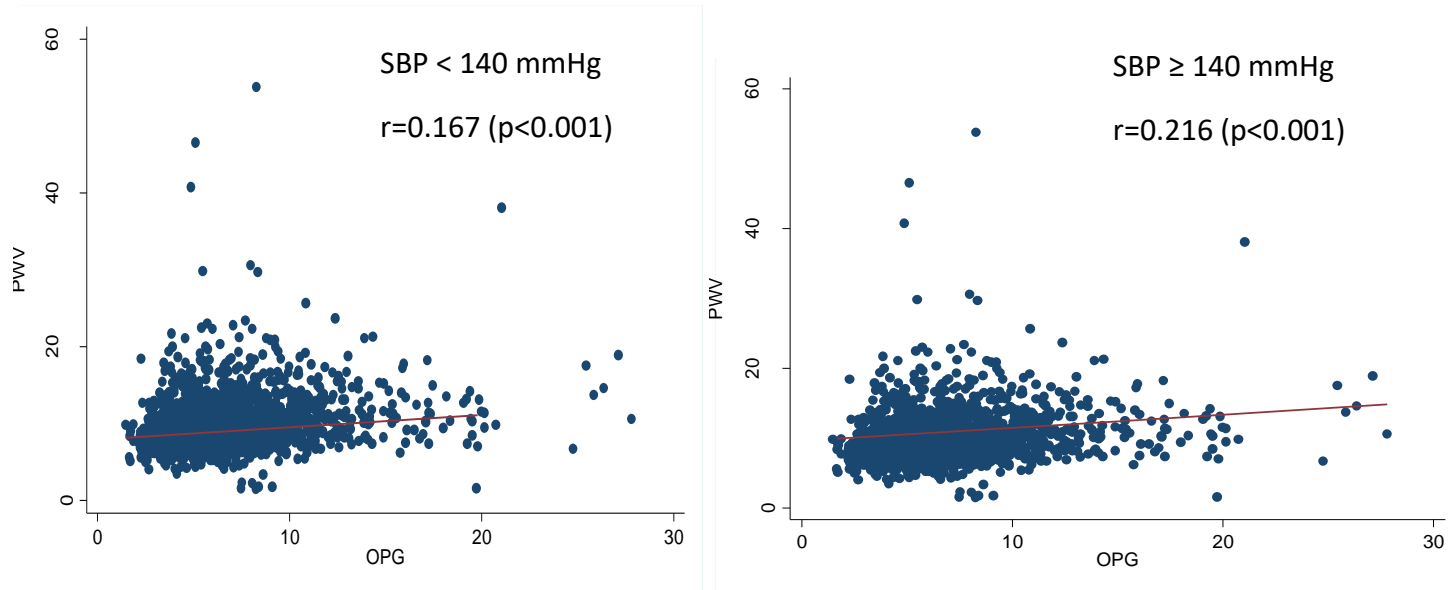

Supplementary Figure 4. Spearman correlation between OPG and PWV at baseline stratified by use of RAS antagonist

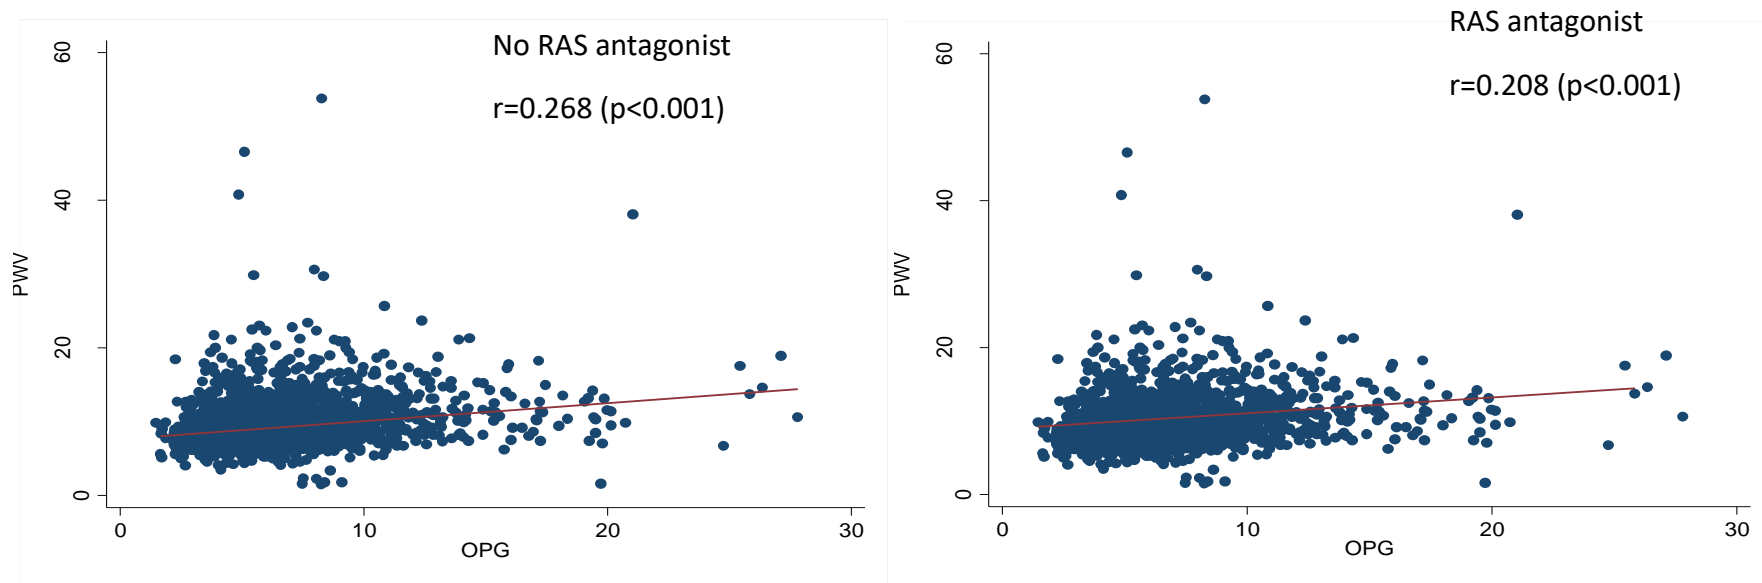

RAS, renin-angiotensin system

Supplementary Figure 5. Spearman correlation between OPG and PWV at baseline stratified by glycemic control

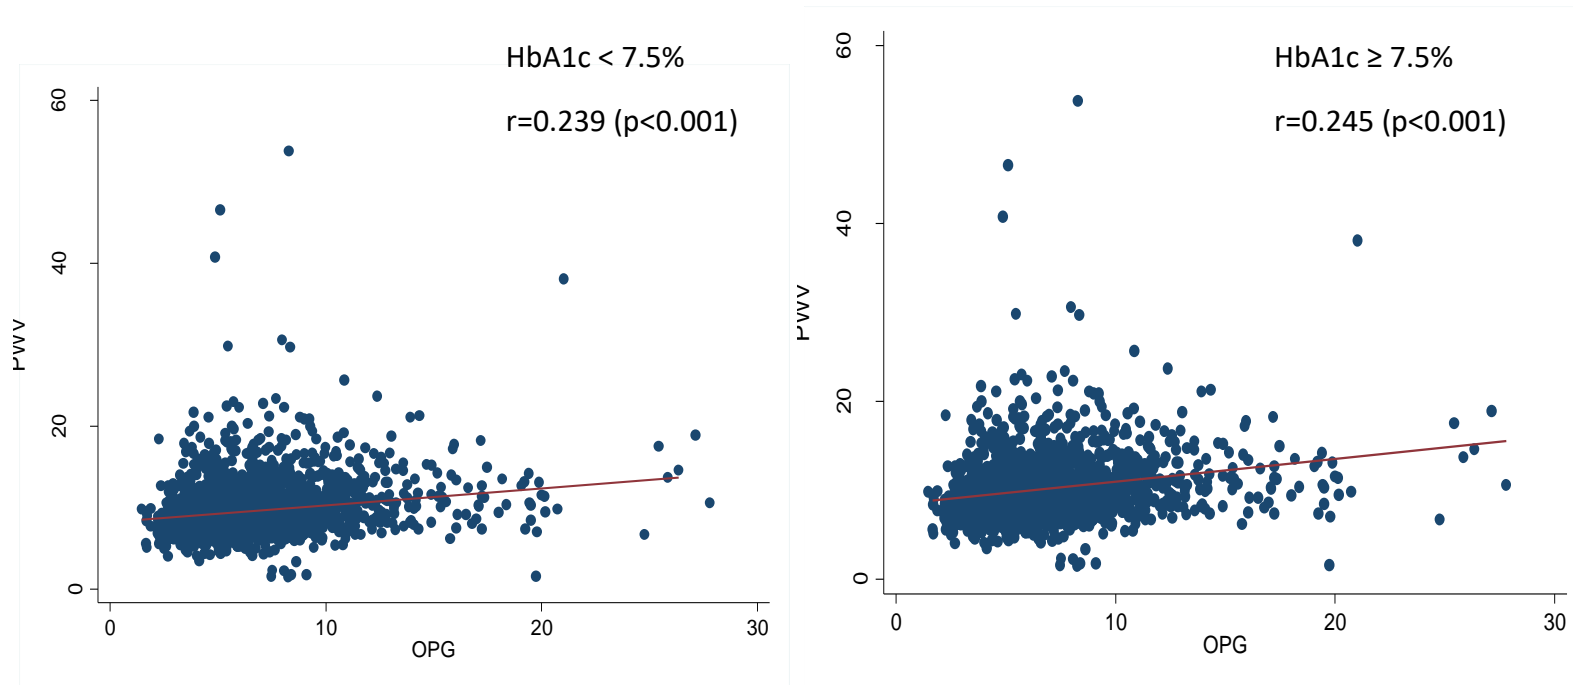

Supplementary Figure 6. Spearman correlation between OPG and PWV at baseline stratified by diabetes duration

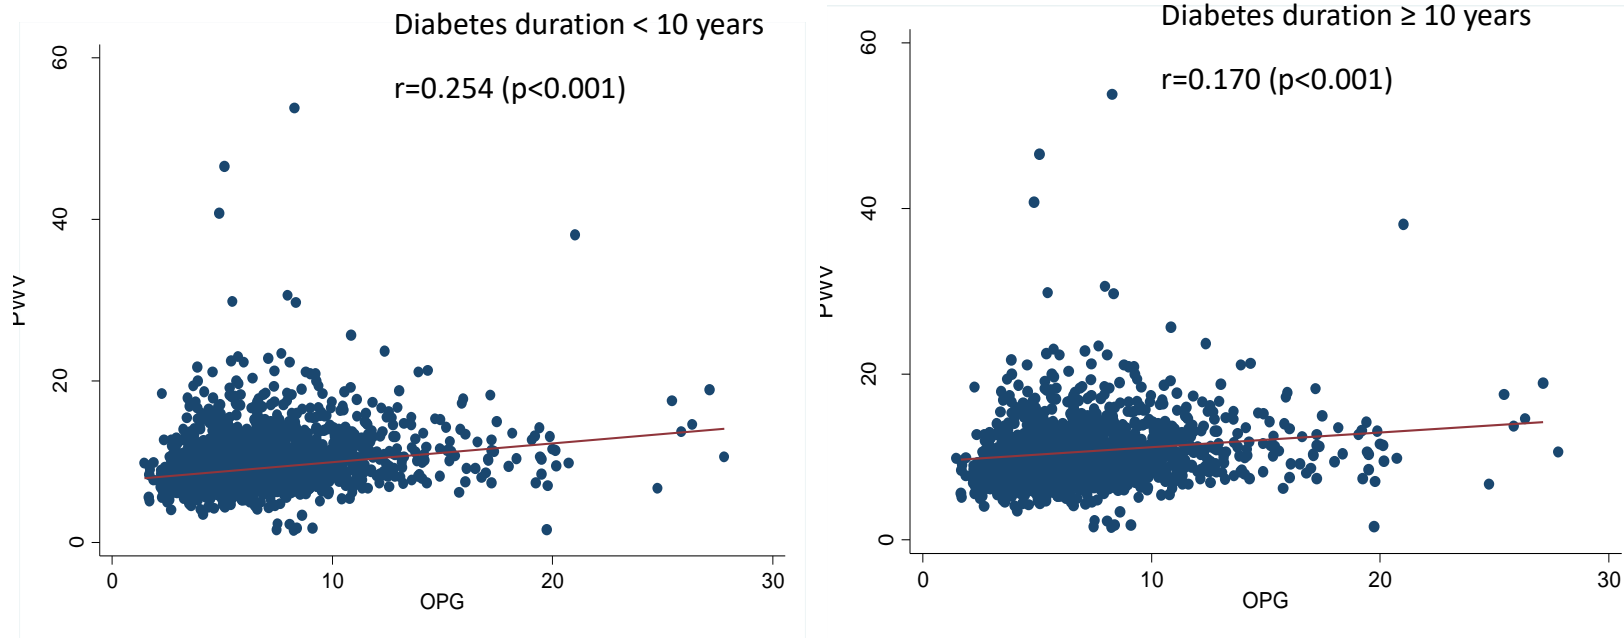

Supplementary Table 1. Correlation between OPG and baseline characteristics

| Clinical variable | Correlation Coefficient | P-value |
|-------------------|-------------------------|---------|
| Age               | 0.317                   | <0.001  |
| BMI               | 0.024                   | 0.306   |
| SBP               | 0.220                   | <0.001  |
| DBP               | 0.022                   | 0.346   |
| FPG               | 0.066                   | 0.004   |
| LDL-C             | 0.012                   | 0.591   |

-0.261 <0.001

---

|        |       |       |        |
|--------|-------|-------|--------|
| TG     | 0.074 | 0.001 |        |
| eGFR   |       |       |        |
| PWV    |       | 0.249 | <0.001 |
| VCAM-1 |       | 0.233 | <0.001 |

---

SBP, systolic blood pressure; FPG, fasting plasma glucose; LDL, low-density lipoprotein; TG, triglycerides; eGFR, estimated glomerular filtration rate; PWV, pulse wave velocity; VCAM-1, vascular cell adhesion molecule

Supplementary Table 2. Proportion of OPG associated SNP (rs1385492) allele frequency stratified by OPG in tertiles

|       | All (N=528) | Tertile 1  | Tertile 2  | Tertile 3  | p-value |
|-------|-------------|------------|------------|------------|---------|
| AA    | 179 (33.9)  | 72 (40.7)  | 58 (33.0)  | 49 (28.0)  | 0.040   |
| GA/GG | 349 (66.1)  | 105 (59.3) | 118 (67.1) | 126 (72.0) |         |

OPG, osteoprotegerin



Supplementary Table 3. Association of OPG associated SNP with clinical variables

| Clinical variable | Coefficient | Standard Error | P-value |
|-------------------|-------------|----------------|---------|
| SBP               | -0.985      | 1.477          | 0.505   |
| DBP               | -0.145      | 0.801          | 0.857   |
| FPG               | 0.215       | 0.232          | 0.355   |
| LDL-C             | -0.043      | 0.073          | 0.557   |
| TG <sup>a</sup>   | 0.023       | 0.050          | 0.636   |
| eGFR              | -3.261      | 2.473          | 0.188   |

SBP, systolic blood pressure; FPG, fasting plasma glucose; LDL, low-density lipoprotein; TG, triglycerides; eGFR, estimated glomerular filtration rate

Adjusted for age, sex and population structure

a. Natural log-transformed
